# Supplementary material for: The Optimising Cardiac Surgery ouTcOmes in People with diabeteS (OCTOPuS) randomised controlled trial to evaluate an outpatient pre-cardiac surgery diabetes management intervention: a study protocol
Source: HighWire-hosted journal article supplement (doi:10.1136/bmjopen-2021-050919), 2021-06-01
Supplement: bmjopen-2021-050919supp002_data_supplement.pdf [file bmjopen-2021-050919supp002_data_supplement.pdf]

## PROGRESS GRADING

### Actions to be taken depending on progress grade

| Grade        | Action                                                                                                                                                                                                         |
|--------------|----------------------------------------------------------------------------------------------------------------------------------------------------------------------------------------------------------------|
| <b>Green</b> | Continue trial, keeping an eye on accrual.                                                                                                                                                                     |
| <b>Amber</b> | Working with governance committees (TSC, TMG, PPI Committees), seek root cause for under performance. Consider whether these can be mitigated through work with organisations or individuals within the study. |
| <b>Red</b>   | Review the study with governance committees, taking steps as detailed under amber, but also explicitly considering recommending study closure.                                                                 |

### Progress grading time points and criteria

| Assessment Point                                                            | Green                                                        | Amber                                                        | Red                                                                                        |
|-----------------------------------------------------------------------------|--------------------------------------------------------------|--------------------------------------------------------------|--------------------------------------------------------------------------------------------|
| <b>After 100 patients have had surgery (50 intervention and 50 control)</b> | HbA <sub>1c</sub> reduction in intervention group >5mmol/mol | HbA <sub>1c</sub> reduction in intervention group <5mmol/mol | HbA <sub>1c</sub> reduction in intervention group not consistent with physiological effect |
